# Supplementary material
Source: PubMed Central journal article supplement (PMC6072026)
Supplement: EHP2080.s001.acco.pdf [file EHP2080.s001.acco.pdf]

**Note to readers with disabilities:** *EHP* strives to ensure that all journal content is accessible to all readers. However, some figures and Supplemental Material published in *EHP* articles may not conform to [508 standards](#) due to the complexity of the information being presented. If you need assistance accessing journal content, please contact [ehp508@niehs.nih.gov](mailto:ehp508@niehs.nih.gov). Our staff will work with you to assess and meet your accessibility needs within 3 working days.

### **Supplemental Material**

#### **A Longitudinal Study Examining Changes in Street Connectivity, Land Use, and Density of Dwellings and Walking for Transport in Brisbane, Australia**

Rebecca Bentley, Tony Blakely, Anne Kavanagh, Zoe Aitken, Tania King, Paul McElwee, Billie Giles-Corti, and Gavin Turrell

### **Table of Contents**

**Table S1.** Number of responses, Variance and Factor Scores from Principal Components Analyses for each wave of the HABITAT survey.

**Table S1. Number of responses, Variance and Factor Scores from Principal Components Analyses for each wave of the HABITAT survey**

| Factor                         | Walkability |        |        |        | Open/green space |        |        |        | City/work |        |        | School/childcare |        |        |        |        |
|--------------------------------|-------------|--------|--------|--------|------------------|--------|--------|--------|-----------|--------|--------|------------------|--------|--------|--------|--------|
|                                | Wave 1      | Wave 2 | Wave 3 | Wave 4 | Wave 1           | Wave 2 | Wave 3 | Wave 4 | Wave 1    | Wave 2 | Wave 3 | Wave 4           | Wave 1 | Wave 2 | Wave 3 | Wave 4 |
| Number responses               | 10,227      | 495    | 487    | 341    | 10,227           | 495    | 487    | 341    | 10,227    | 495    | 487    | 341              | 10,227 | 495    | 487    | 341    |
| Variance in data explained (%) | 19          | 21     | 23     | 21     | 16               | 18     | 16     | 17     | 13        | 12     | 11     | 13               | 12     | 11     | 10     | 11     |
| <b>Variable</b>                |             |        |        |        |                  |        |        |        |           |        |        |                  |        |        |        |        |
| Ease of walking                | 0.31        | 0.21   | 0.23   | 0.27   | 0.05             | 0.07   | 0.04   | 0.07   | -0.10     | 0.01   | -0.17  | -0.06            | -0.09  | -0.11  | 0.05   | -0.19  |
| Close to shops                 | 0.33        | 0.29   | 0.31   | 0.28   | -0.18            | -0.03  | -0.04  | -0.03  | 0.07      | -0.08  | -0.12  | -0.05            | -0.01  | -0.04  | -0.08  | -0.01  |
| Close to public transport      | 0.38        | 0.38   | 0.38   | 0.04   | -0.10            | -0.10  | -0.10  | -0.03  | -0.08     | -0.08  | -0.08  | -0.21            | -0.03  | -0.03  | -0.03  | 0.46   |
| Access to freeways/main roads  | 0.12        | 0.12   | 0.12   | 0.35   | -0.12            | -0.12  | -0.12  | -0.09  | 0.30      | 0.30   | 0.30   | -0.09            | -0.04  | -0.04  | -0.04  | -0.02  |
| Safety from crime              | 0.12        | -0.12  | -0.10  | -0.12  | 0.18             | 0.12   | 0.18   | 0.14   | -0.09     | 0.02   | 0.34   | 0.05             | -0.01  | 0.42   | -0.05  | 0.33   |
| Affordability                  | 0.29        | -0.05  | -0.12  | -0.05  | 0.11             | -0.12  | 0.00   | 0.11   | -0.24     | -0.07  | 0.49   | 0.13             | -0.14  | 0.65   | -0.04  | 0.67   |
| Close to work                  | -0.01       | 0.18   | 0.11   | -0.01  | -0.14            | -0.16  | -0.22  | -0.08  | 0.38      | 0.09   | 0.40   | 0.34             | 0.06   | 0.19   | 0.07   | 0.14   |
| Close to open space            | -0.04       | -0.04  | -0.04  | 0.20   | 0.46             | 0.46   | 0.46   | 0.06   | -0.17     | -0.17  | -0.17  | -0.16            | -0.04  | -0.04  | -0.04  | -0.07  |
| Close to school                | -0.01       | -0.01  | -0.01  | 0.28   | -0.05            | -0.05  | -0.05  | 0.07   | -0.18     | -0.18  | -0.18  | -0.12            | 0.56   | 0.56   | 0.56   | -0.11  |
| Close to open spaces           | -0.04       | -0.04  | -0.04  | 0.14   | 0.12             | 0.12   | 0.12   | -0.11  | 0.13      | 0.13   | 0.13   | 0.27             | 0.14   | 0.14   | 0.14   | -0.06  |
| Close to city                  | -0.05       | -0.05  | -0.05  | 0.02   | -0.02            | -0.02  | -0.02  | 0.11   | 0.45      | 0.45   | 0.45   | 0.10             | -0.13  | -0.13  | -0.13  | 0.05   |
| Close to child care            | -0.16       | -0.08  | -0.07  | -0.09  | -0.10            | -0.02  | 0.02   | 0.05   | 0.02      | 0.56   | -0.15  | 0.51             | 0.62   | -0.06  | 0.61   | -0.16  |
| Close to green space           | -0.16       | -0.16  | -0.14  | -0.17  | 0.47             | 0.47   | 0.49   | 0.49   | 0.01      | -0.06  | -0.08  | -0.02            | -0.09  | -0.07  | -0.01  | -0.06  |
| Investment potential           | -0.24       | -0.24  | -0.24  | -0.04  | 0.22             | 0.22   | 0.22   | -0.15  | 0.32      | 0.32   | 0.32   | 0.14             | -0.05  | -0.05  | -0.05  | 0.29   |
